# Supplementary material
Source: PubMed Central journal article supplement (PMC4974356)
Supplement: NIHMS785616-supplement-1.pdf [file NIHMS785616-supplement-1.pdf]

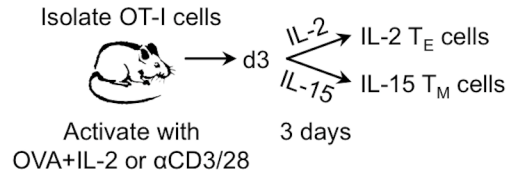

**Figure S1. *In vitro* differentiation of IL-2 T<sub>E</sub> and IL-15 T<sub>M</sub> cells approximate T cell response conditions that generate T<sub>E</sub> and T<sub>M</sub> cells *in vivo* (Related to Figure 1).**

OT-I cells were activated with IL-2 and either OVA peptide or αCD3/CD28 for 3 days and then differentially cultured in IL-2 or IL-15 for an additional 3 days to generate IL-2 T<sub>E</sub> and IL-15 T<sub>M</sub> cells, respectively.
