# Supplementary material
Source: PubMed Central journal article supplement (PMC4974356)
Supplement: NIHMS785616-supplement-4.pdf [file NIHMS785616-supplement-4.pdf]

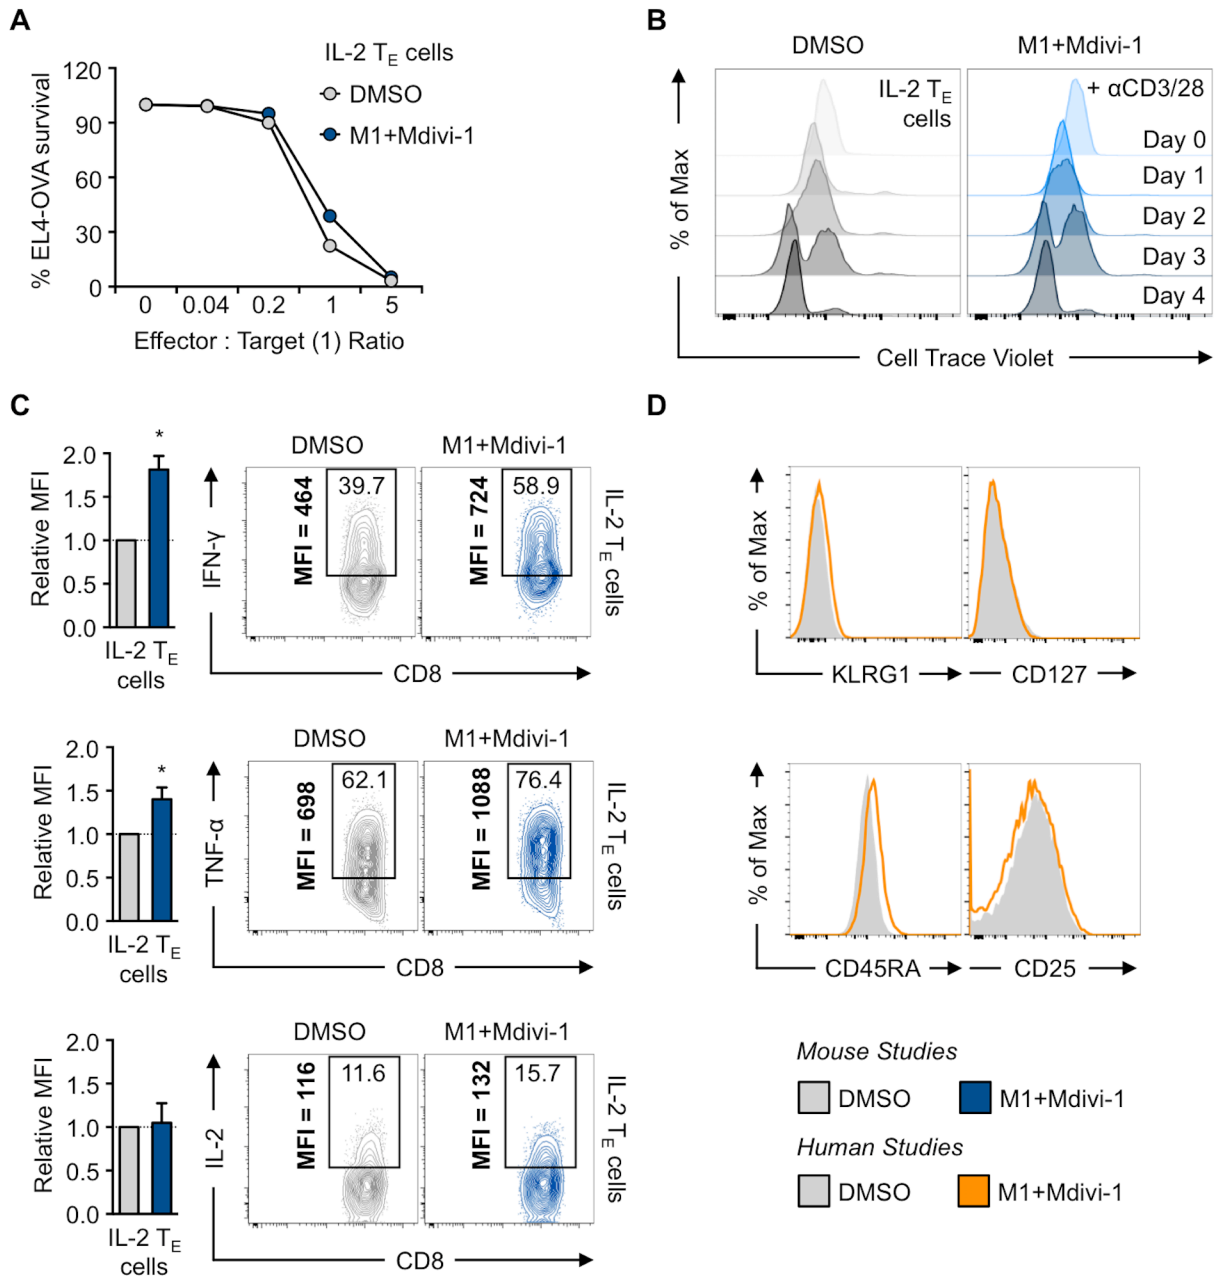

**Figure S4. Examination of mouse and human IL-2 T<sub>E</sub> cells after enforcing mitochondrial fusion with drugs (Related to Figure 4).**

(A-C) Flow cytometry analyses of IL-2 T<sub>E</sub> cells previously cultured with DMSO or M1+Mdivi-1 combined from 3 biological replicates. Cells were not subjected to further treatment with DMSO or M1+Mdivi-1 during experiment assays. (A) Cytotoxicity of EL4-OVA target cells at indicated concentrations. (B) Proliferation after restimulation with  $\alpha$ CD3/CD28. (C) Intracellular cytokine staining after 4 hours stimulation with PMA and ionomycin. Relative MFI (left) with mean  $\pm$  SEM and representative contour plots (right) with percentage of cytokine positive cells indicated in gated cells and MFI in bold, \* $p < 0.05$ . Gates based on unstimulated cells (not shown). (D) Human CD8<sup>+</sup> PBMCs were activated with  $\alpha$ CD3/CD28 + IL-2 to generate IL-2 T<sub>E</sub> cells and subjected to DMSO or M1+Mdivi-1 treatment. KLRG1, CD127, CD45RA, and CD25 surface marker expression analyzed by flow cytometry shown with representative histograms from 4-6 biological replicates.
