# Supplementary material
Source: PubMed Central journal article supplement (PMC4974356)
Supplement: NIHMS785616-supplement-5.pdf [file NIHMS785616-supplement-5.pdf]

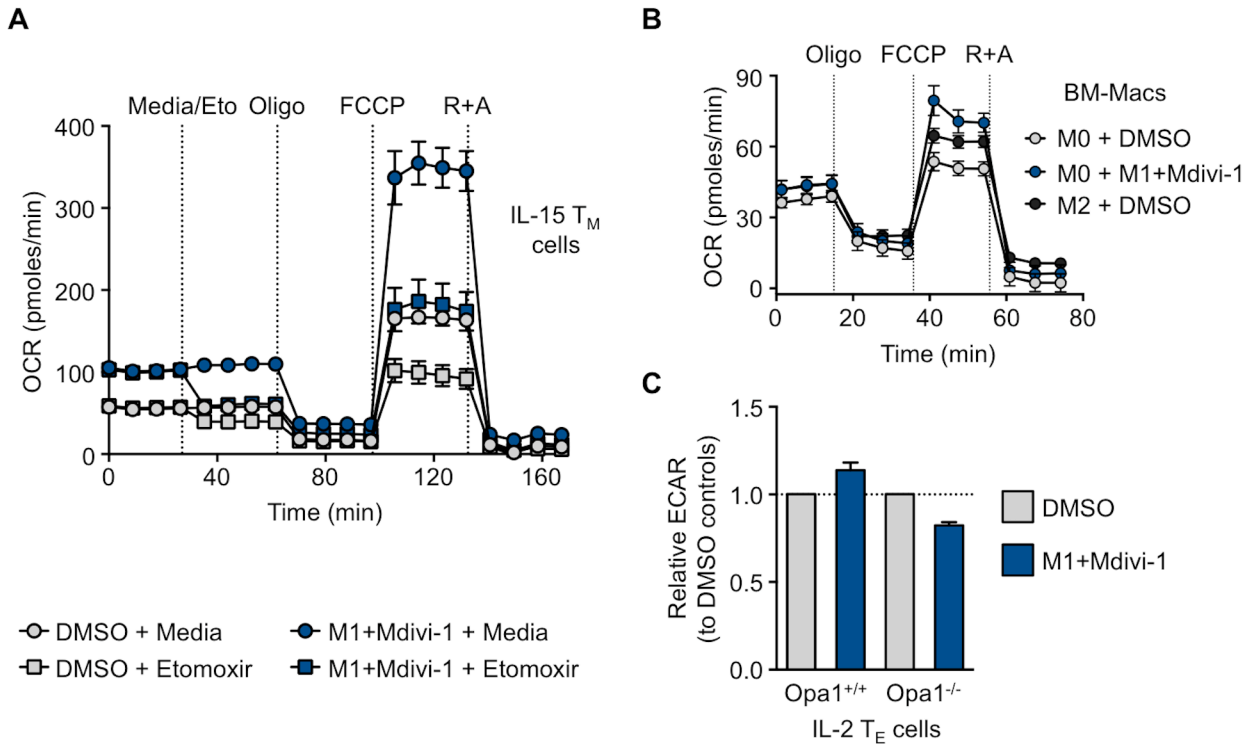

**Figure S5. Bioenergetics analysis after promoting mitochondrial fusion in T cells and macrophages (Related to Figure 5).**

(A) OCR of IL-15 T<sub>M</sub> DMSO or M1+Mdivi-1 treated cells measured at baseline and in response to media, etomoxir (Eto), oligomycin (Oligo), FCCP, and rotenone plus antimycin A (R+A). (B) Bone marrow derived macrophages were cultured overnight with IL-4 (M2) or without (M0) and either DMSO or M1+Mdivi-1 overnight. OCR analyzed at baseline and after injection of mitochondrial inhibitors as indicated. (C) Baseline ECAR relative to DMSO controls of IL-2 T<sub>E</sub> Opa1<sup>+/+</sup> and Opa1<sup>-/-</sup> cells cultured in DMSO or M1+Mdivi-1. (A-C) Data are shown as mean ± SEM and are representative of 2-3 experiments.
